# Supplementary material for: Passive Tracer Modelling at Super-Resolution with WRF-ARW to Assess Mass-Balance Schemes
Source: Copernicus journal article supplement (doi:10.5194/egusphere-2022-1125), 2022-11-21
Supplement: Supplementary file 1 [file egusphere-2022-1125-supplement.pdf]

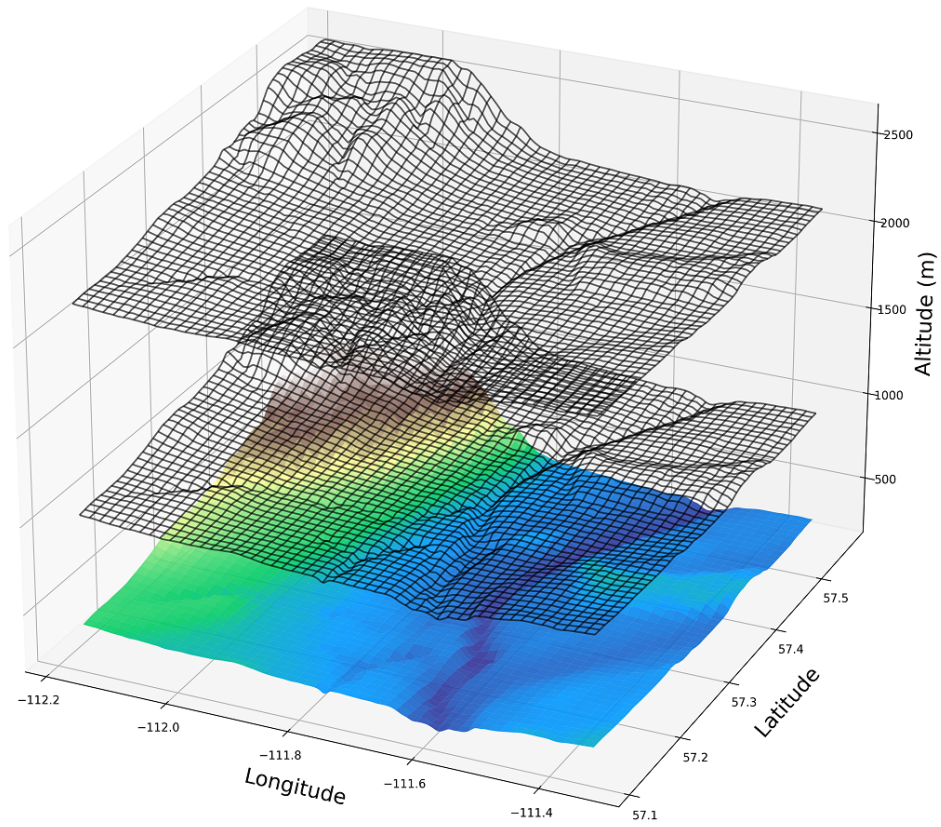

**Figure S1.** Topography of the modelling region for domain d05 (finest domain) is shown, lower elevations such as the Athabasca river valley is shown in dark blue and higher elevations are shown with colours green and brown. Our WRF model simulations use terrain-following model layers to ensure continuity in the modelling layers and proper treatment of the interaction between the atmospheric flow and the topography. Two model layers at levels 42 and 55 are also shown (mesh).

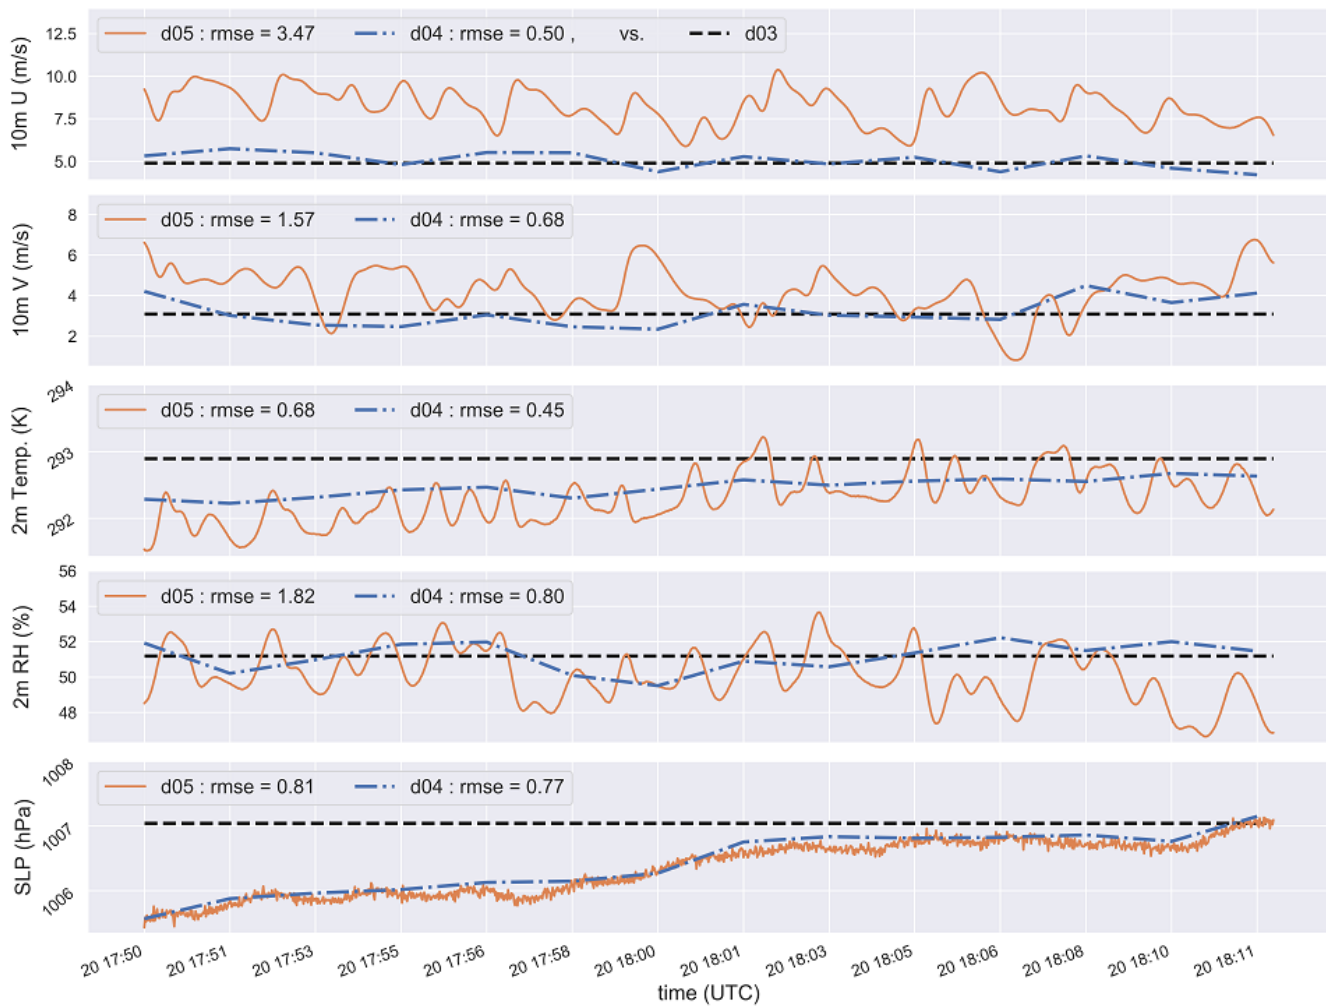

**Figure S2.** Model output meteorological fields from the two fine resolution domains d04 and d05 evaluated against d03 output for the location of CNRL facility. d04 and d05 output fields show good agreement to d03 for sea level pressure, humidity, temperature and wind. d05 wind speeds were biased high by 1.57 m/s and 3.47 m/s.

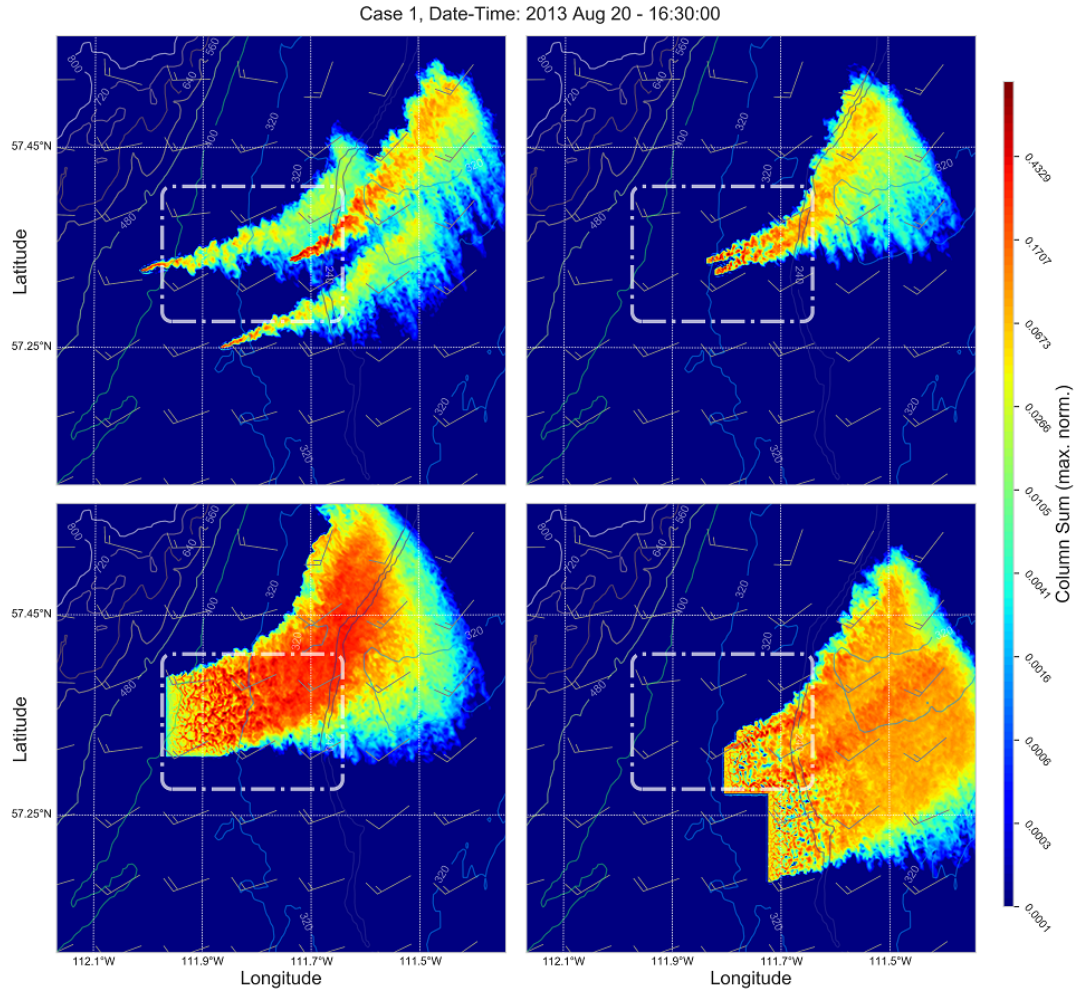

**Figure S3.** Case 1: top view of the 50 m resolution modelling domain with tracer plumes from our eleven emission scenarios at 16:30UT on 20 August 2013. Tracer plumes are dispersed and advected well beyond the boundaries of the CNRL facility, shown with the dashed curve (same as the small box in Fig. 6). 10-m wind data is shown with wind barbs over the entire domain (flag: half 5 knots, full 10 knots). The data shown is the tracer column total normalized to the maximum value for each panel. (top left) point/stack sources CNRL0-4, CNRLs and CNRLw. (top right) surface/area sources MINE1 and MINE2. (bottom left) the large area (surface) sources POND. (bottom right) the multi-segment line (surface) source HWY. Refer to Table 2 for source specifications.

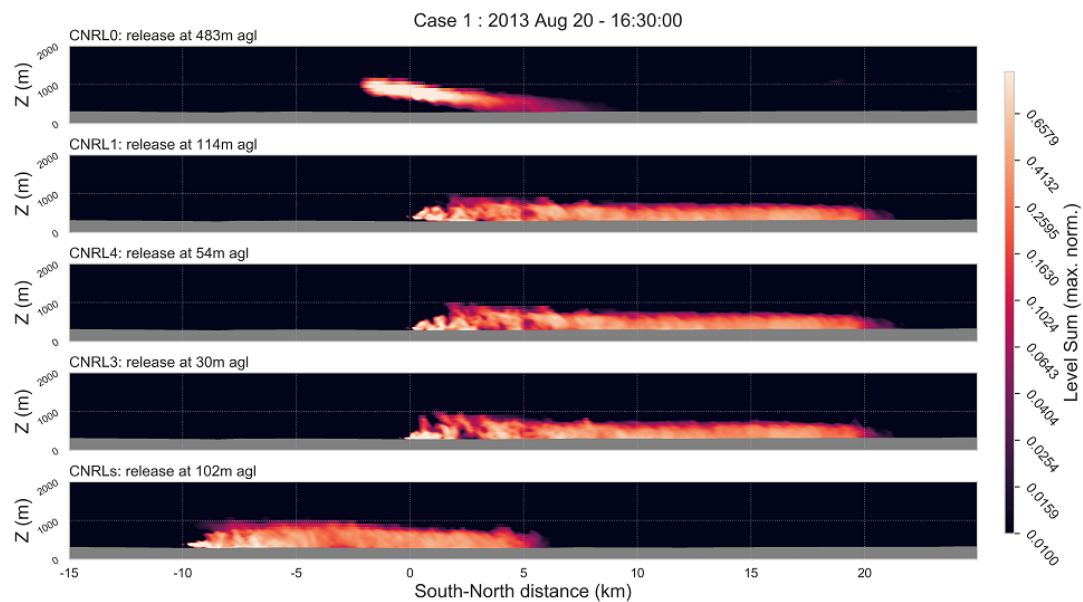

**Figure S4.** Domain d05 south-north vertical cross-section for case 1 on 20 August 2013. Vertical cross-section of tracer plumes from stack/point emission sources are shown with release heights indicated for each source. Data shown is the level tracer count sum normalized to maximum values for each source. The origin for south-north distance in km is at domain centre.

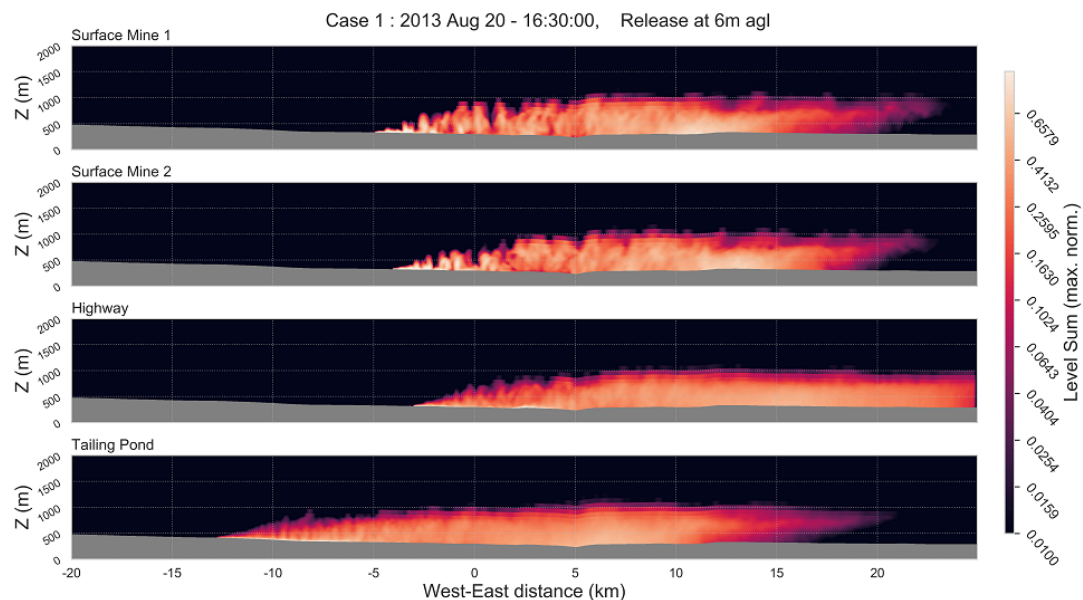

**Figure S5.** Domain d05 west-east vertical cross-section for case 1 on 20 August 2013. Vertical cross-section of tracer plumes from surface emission sources (area, line) are shown. Release height above ground is 6 m agl for all sources. Data shown is the level tracer count sum normalized to maximum values for each source. The origin for west-east distance in km is at domain centre.

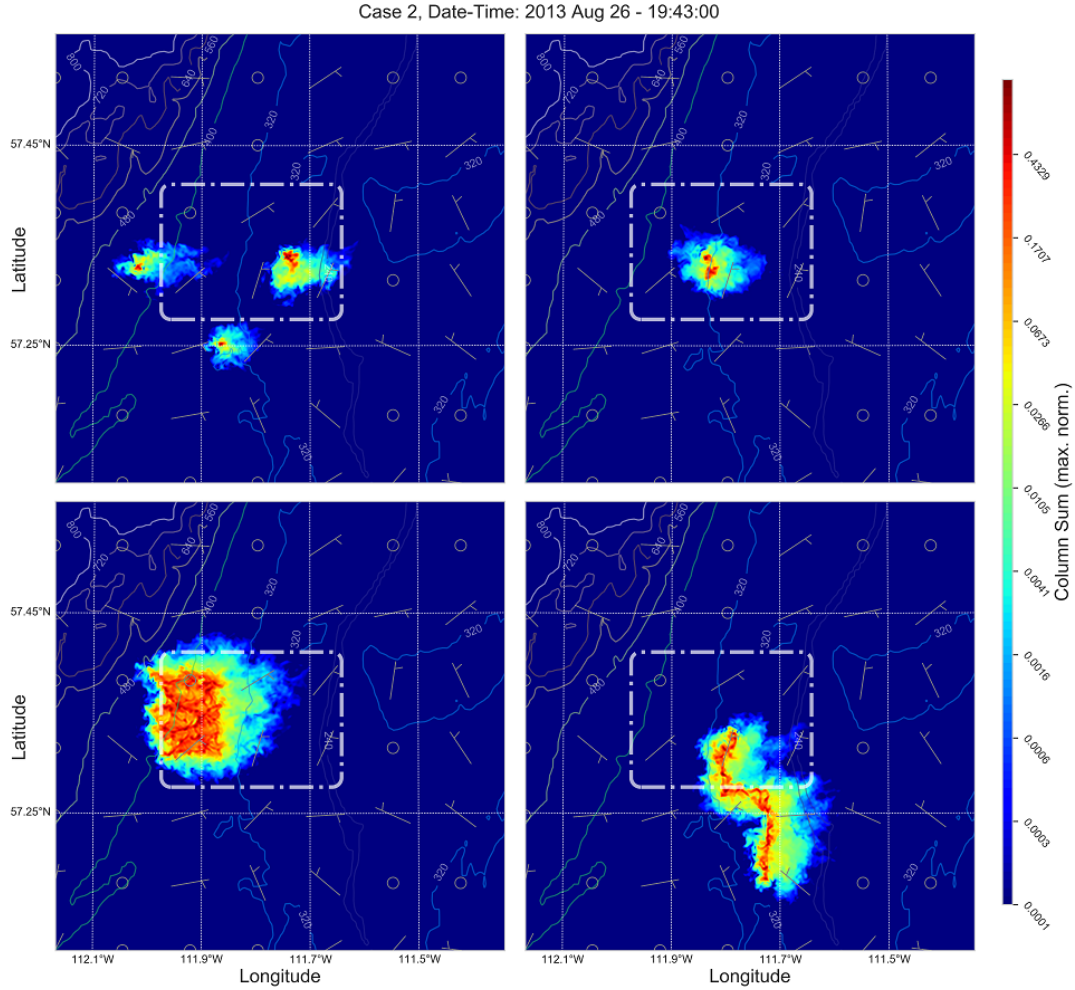

**Figure S6.** Case 2: top view of the 50 m resolution modelling domain with tracer plumes from our eleven emission scenarios at 19:43UT on 26 August 2013. 10-m wind data is shown with wind barbs over the entire domain (flag: half 5 knots, full 10 knots). The data shown is the tracer column total normalized to the maximum value for each panel. (top left) point/stack sources CNRL0-4, CNRLs and CNRLw. (top right) surface/area sources MINE1 and MINE2. (bottom left) the large area (surface) sources POND. (bottom right) the multi-segment line (surface) source HWY. For this case tracer plumes were not advected considerably, due to low and spatially variable winds. Refer to Table 2 for source specifications.



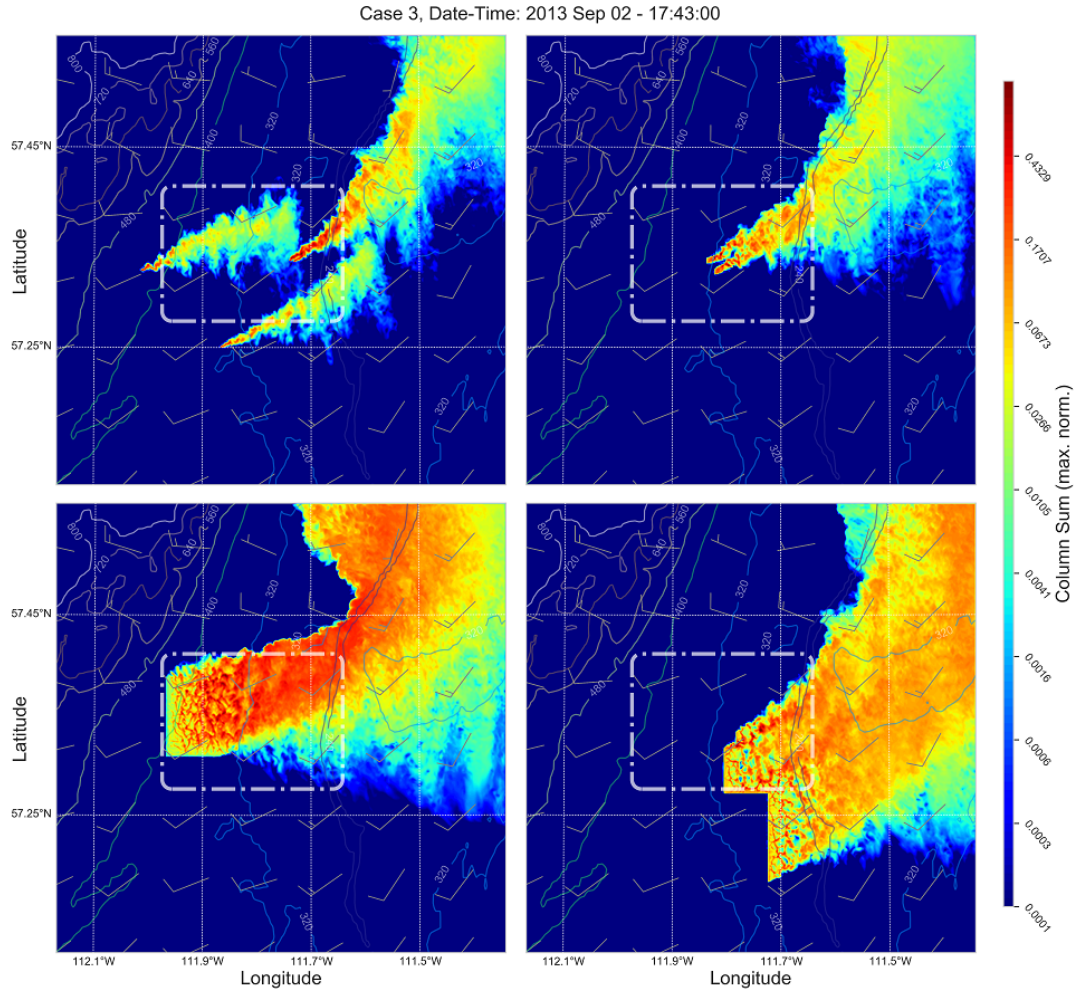

**Figure S7.** Case 3: top view of the 50 m resolution modelling domain with tracer plumes from our eleven emission scenarios at 17:43UT on 2 September 2013. Tracer plumes are dispersed and advected well beyond the boundaries of the CNRL facility (dashed curve) as in case 1. Wind data at 10 m agl is shown with wind barbs over the entire domain (flag: half 5 knots, full 10 knots). The data shown is the tracer column total normalized to the maximum value for each panel. (top left) point/stack sources CNRL0-4, CNRLs and CNRLw. (top right) surface/area sources MINE1 and MINE2. (bottom left) the large area (surface) sources POND. (bottom right) the multi-segment line (surface) source HWY. Refer to Table 2 for source specifications.
